# Supplementary material for: Field Experience for Determination of Formaldehyde in Stack Emissions
Source: MDPI journal article supplement (doi:10.3390/app121910150), 2022-10-09
Supplement: s1 [file s1]

**Table S1.** Elution gradient of HPLC analysis by Lab. APPA Trento.

| <b>Time<br/>(min)</b> | <b>Ultrapure Water<br/>Concentration<br/>(%)</b> | <b>Acetonitrile<br/>Concentration<br/>(%)</b> |
|-----------------------|--------------------------------------------------|-----------------------------------------------|
| 0                     | 40                                               | 60                                            |
| 7                     | 40                                               | 60                                            |
| 13                    | 30                                               | 70                                            |
| 17                    | 20                                               | 80                                            |
| 20                    | 0                                                | 100                                           |

**Table S2.** Elution gradient of HPLC analysis by Lab. RSE.

| <b>Time<br/>(min)</b> | <b>Ultrapure Water<br/>Concentration<br/>(%)</b> | <b>Acetonitrile<br/>Concentration<br/>(%)</b> |
|-----------------------|--------------------------------------------------|-----------------------------------------------|
| 0                     | 60                                               | 40                                            |
| 4                     | 60                                               | 40                                            |
| 16                    | 45                                               | 55                                            |
| 22                    | 20                                               | 80                                            |
| 24                    | 20                                               | 80                                            |
| 24.5                  | 60                                               | 40                                            |
| 35                    | 60                                               | 40                                            |

### *Analytical Results*

Tables S3 and S4 shows the average formaldehyde value in each of the sampling conducted during First and Second campaign.

**Table S3.** Analytical values obtained by Lab. APPA Trento and Lab. RSE using different methods during first campaign.

| <b>Samplings</b> | <b>LAB A Sampling<br/>LAB A—EPA 323<br/>Analysis<br/>(mg/m<sup>3</sup>)</b> | <b>LAB B Sampling<br/>LAB A—VDI 3862<br/>Analysis<br/>(mg/m<sup>3</sup>)</b> | <b>LAB B Sampling<br/>LAB B Analysis—VDI<br/>3862<br/>(mg/m<sup>3</sup>)</b> |
|------------------|-----------------------------------------------------------------------------|------------------------------------------------------------------------------|------------------------------------------------------------------------------|
| 1                | 3.25                                                                        | 15.32                                                                        | 16.72                                                                        |
| 2                | 2.07                                                                        | 2.10                                                                         | 1.21                                                                         |
| 3                | 6.09                                                                        | 17.96                                                                        | 23.71                                                                        |
| 4                | 0.33                                                                        | 4.83                                                                         | 3.13                                                                         |
| 5                | 0.22                                                                        | 8.44                                                                         | 7.25                                                                         |
| 6                | 0.25                                                                        | 4.41                                                                         | 3.00                                                                         |
| 7                | 0.24                                                                        | 4.58                                                                         | 2.91                                                                         |
| 8                | 0.32                                                                        | 4.64                                                                         | 2.88                                                                         |
| 9                | 5.91                                                                        | 6.14                                                                         | 5.35                                                                         |
| 10               | 6.48                                                                        | 5.78                                                                         | 4.35                                                                         |
| 11               | 5.49                                                                        | 5.76                                                                         | 3.74                                                                         |
| 12               | 6.02                                                                        | 4.98                                                                         | 3.00                                                                         |
| 13               | 6.45                                                                        | 5.58                                                                         | 3.41                                                                         |
| 14               | 5.83                                                                        | 5.67                                                                         | 6.40                                                                         |

**Table S4.** Analytical values obtained by Lab. APPA Trento and Lab. RSE using different methods during second campaign.

| Samplings          | LAB A Sampling                                    | LAB B Sampling                                     | LAB B Sampling                                     |
|--------------------|---------------------------------------------------|----------------------------------------------------|----------------------------------------------------|
|                    | LAB A—EPA 323<br>Analysis<br>(mg/m <sup>3</sup> ) | LAB A—VDI 3862<br>Analysis<br>(mg/m <sup>3</sup> ) | LAB B Analysis—VDI<br>3862<br>(mg/m <sup>3</sup> ) |
| 1                  | 2.32                                              | 3.47                                               | 2.39                                               |
| 2                  | 2.28                                              | 3.06                                               | 1.65                                               |
| 3                  | 2.52                                              | 3.31                                               | 1.77                                               |
| 4                  | 2.71                                              | 3.26                                               | 1.66                                               |
| 5                  | 2.58                                              | 3.10                                               | 1.86                                               |
| 6                  | 3.05                                              | 3.41                                               | 1.56                                               |
| 7                  | 3.11                                              | 3.42                                               | 1.45                                               |
| 8                  | 3.29                                              | 3.59                                               | 1.64                                               |
| 9                  | 3.27                                              | 3.62                                               | 1.58                                               |
| 10                 | 3.65                                              | 3.77                                               | 1.62                                               |
| <b>Average</b>     | <b>2.09</b>                                       | <b>3.40</b>                                        | <b>2.88</b>                                        |
| <b>Uncertainty</b> | <b>1.07</b>                                       | <b>0.45</b>                                        | <b>0.92</b>                                        |

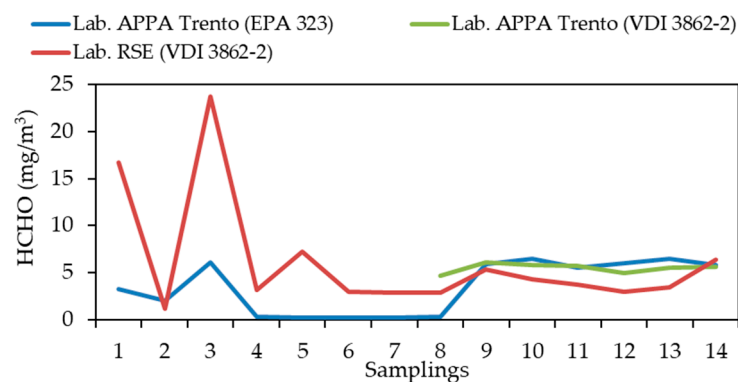

**Figure S1.** Comparison between the values measured during the first campaign.

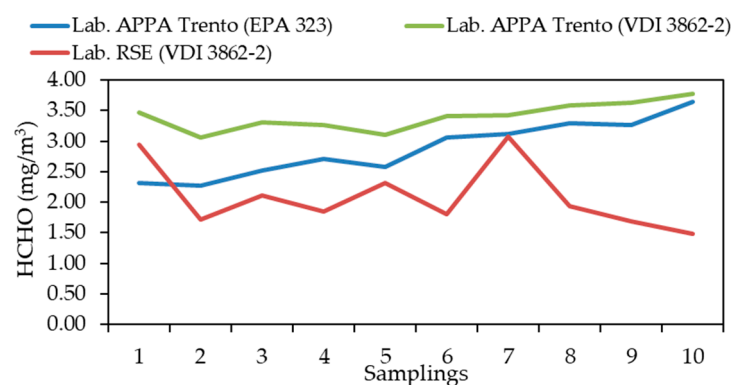

**Figure S2.** Comparison between the values measured during the second campaign.
